# Supplementary material for: Synthesis, Herbicidal Evaluation, and Structure‐Activity Relationship of Benzophenone Oxime Ether Derivatives
Source: Hindawi journal article supplement (doi:10.1155/2015/435219), 2015-01-01
Supplement: f1 [file 435219.f1.doc]

**Supporting information**

**Synthesis, herbicidal evaluation and structure-activity relationship of benzophenone oxime ether derivatives**

Jimei Ma1, Mingwei Ma1, Linhao Sun, Zhen Zeng, Hong Jiang*

Department of Chemistry, College of Sciences, Huazhong Agricultural University, Wuhan 430070, China

* Corresponding author. Phone number: +86-27-87284018. E-mail address: Jianghong0066@126.com

1 These authors contributed equally to this paper.

Table of content

The characterization of compound **5a**-**5x** 1

Table **S1** The average inhibitory rate at different concentration 7

Table **S2** Correlation analysis between the inhibitory rate on root growth of *Oryza sativa*, *Sorghum sundanenses* and the concentration of the test compounds 11

Table **S3** Correlation analysis between the inhibitory rate on root growth of *Brassica chinensis*, *Amaranthus mangostanus* and the concentration of the test compounds 12

The characterization of compound **5a**-**5x**.

*(p-Chlorophenyl)(phenyl)methanone O-(2-(dipropylamino)ethyl) oxime (****5a****).*

Ethyl acetate as eluent, 86% yield, light yellow oil. IR (KBr) υ: 3059, 1659, 1596, 1489, 1444, 1055 cm-1; 1H NMR (CDCl3, 400 MHz) δ 7.50–7.31 (m, 9H), 4.32–4.20 (t, *J* = 6.0 Hz, 2H), 2.81 (t, *J* = 6.0 Hz, 2H), 2.43 (t, *J* = 7.6 Hz, 4H), 1.53–1.42 (m, 4H), 0.86 (t, *J* = 7.6 Hz, 6H); MS m/z: 360 (M++1, 36), 359 (100).

*(p-Chlorophenyl)(phenyl)methanone O-(2-(dibutylamino)ethyl) oxime (****5b****).*

Ethyl acetate as eluent, 82% yield, light yellow oil. IR (KBr) υ: 3059, 1659, 1595, 1489, 1444, 1060 cm-1; 1H NMR (CDCl3, 400 MHz) δ 7.52–7.28 (m, 9H), 4.30–4.26 (m, 2H), 2.80 (t, *J* = 6.4 Hz, 2H), 2.45 (t, *J* = 7.2 Hz, 4H), 1.50–1.35 (m, 4H), 1.34–1.25 (m, 4H), 0.91 (t, *J* = 7.2 Hz, 6H); MS m/z: 388 (M++1, 5), 387 (100).

*Phenyl(p-tolyl)methanone O-(2-(dipropylamino)ethyl) oxime (****5c****).*

Ethyl acetate as eluent, 89% yield, light yellow oil. IR (KBr) υ: 3056, 1659, 1590, 1489, 1444, 1052 cm-1; 1H NMR (CDCl3, 400 MHz) δ 7.54 (dd, *J* = 8.0, 1.6 Hz, 1H), 7.47–7.32 (m, 6H), 7.26 (d, *J* = 8.0 Hz, 1H), 7.17 (d, *J* = 8.0 Hz, 1H), 4.31 (dd, *J* = 12.0, 6.0 Hz, 2H), 2.85 (dd, *J* = 12.0, 6.0 Hz, 2H), 2.47–2.39 (m, 7H), 1.50–1.44 (m, 4H), 0.88 (dt, *J* = 7.2, 3.2 Hz, 6H); MS m/z: 340 (M++1, 27), 339 (100).

*Phenyl(p-tolyl)methanone O-(2-(dibutylamino)ethyl) oxime (****5d****).*

Ethyl acetate as eluent, 79% yield, light yellow oil. IR (KBr) υ: 3054, 1658, 1588, 1493, 1444, 1051 cm-1; 1H NMR (CDCl3, 400 MHz) δ 7.63–7.06 (m, 9H), 4.30 (dd, *J* = 12.0, 6.0 Hz, 2H), 2.83 (dd, *J* = 12.0, 6.0 Hz, 2H), 2.50–2.39 (m, 7H), 1.50–1.38 (m, 4H), 1.36–1.25 (m, 4H), 0.92 (t, *J* = 7.2 Hz, 6H); MS m/z: 368 (M++1, 27), 367 (100).

*Phenyl(p-tolyl)methanone O-(2-(piperidin-1-yl)ethyl) oxime (****5e****).*

Ethyl acetate as eluent, 82% yield, light yellow oil. IR (KBr) υ: 3054, 1652, 1578, 1507, 1444, 1050 cm-1; 1H NMR (CDCl3, 400 MHz) δ 7.58–7.09 (m, 9H), 4.36 (d, *J* = 12.0, 6.0 Hz,2H), 2.73 (dd, *J* = 12.0, 6.0 Hz, 2H), 2.48–2.25 (m, 7H), 1.63–1.57 (m, 4H), 1.45–1.43 (m,2H); MS m/z: 323 (M++1, 27), 322 (100).

*Phenyl(p-chlorophenyl)methanone O-(2-(piperidin-1-yl)ethyl) oxime (****5f****).*

Ethyl acetate as eluent, 80% yield, light yellow oil. IR (KBr) υ: 3056, 1663, 1593, 1484, 1443, 1048 cm-1; 1H NMR (CDCl3, 600 MHz) δ 7.46–7.31 (m, 9H), 4.32 (t, *J* = 6.0 Hz, 2H), 2.68 (t, *J* = 6.0 Hz, 2H), 2.43–2.41 (m, 4H), 1.59–1.55 (m, 4H), 1.43–1.41 (m, 2H); MS m/z: 343 (M++1, 21), 342 (100).

*Phenyl(p-bromophenyl)methanone O-(2-(piperidin-1-yl)ethyl) oxime (****5g****).*

Ethyl acetate as eluent, 77% yield, light yellow oil. IR (KBr) υ: 3058, 1662, 1595, 1483, 1442, 1047 cm-1; 1H NMR (CDCl3, 600 MHz) δ 7.56–7.24 (m, 9H), 4.28 (t, *J* = 6.0 Hz, 2H), 2.79 (t, *J* = 6.0 Hz, 2H), 2.44–2.43 (m, 4H), 1.58–1.54 (m, 4H), 1.42–1.40 (m, 2H); MS m/z: 387 (M++1, 24), 386 (100).

*Phenyl(o-chlorophenyl)methanone O-(2-(piperidin-1-yl)ethyl) oxime (****5h****).*

Ethyl acetate as eluent, 83% yield, light yellow oil. IR (KBr) υ: 3056, 1671, 1595, 1565, 1497, 1024 cm-1; 1H NMR (CDCl3, 600 MHz) δ 7.49–7.12 (m, 9H), 4.35 (t, *J* = 6.0 Hz, 2H), 2.70 (t, *J* = 6.0 Hz, 2H), 2.40 (s, 4H), 1.57–1.53 (m, 4H), 1.40 (s, 2H); MS m/z: 343 (M++1, 23), 342 (100).

*Phenyl(p-nitrophenyl)methanone O-(2-(piperidin-1-yl)ethyl) oxime (****5i****).*

Ethyl acetate as eluent, 78% yield, light yellow oil. IR (KBr) υ: 3061, 1674, 1609, 1586, 1442, 1038 cm-1; 1H NMR (CDCl3, 600 MHz) δ 8.29 (d, *J* = 9.0 Hz, 1H), 8.18 (d, *J* = 9.0 Hz, 1H), 7.66 (d, *J* = 9.0 Hz, 1H), 7.56 (d, *J* = 9.0 Hz, 1H), 7.47–7.39 (m, 3H), 7.32–7.31 (m, 2H), 4.37 (dd, *J* = 12.0, 6.0 Hz, 2H), 2.69 (dd, *J* = 9.0, 6.0 Hz, 2H), 2.43–2.41 (m, 4H), 1.57–1.55 (m, 4H), 1.43–1.42 (m, 2H); MS m/z: 354 (M++1, 21), 353 (100).

*(p-Chlorophenyl)(phenyl)methanone O-(2-(4-methylpiperazin-1-yl)ethyl) oxime (****5j****).*

Methanol as eluent, 74% yield, light yellow oil. IR (KBr) υ: 3060, 1676, 1596, 1486, 1447, 1051 cm-1; 1H NMR (CDCl3, 400 MHz) δ 7.48–7.33 (m, 9H), 4.35 (t, *J* = 6.0 Hz, 2H), 2.73 (t, *J* = 6.0 Hz, 2H), 2.53–2.27 (m, 11H); MS m/z: 359 (M++1, 25), 358 (100).

*(p-Bromophenyl)(phenyl)methanone O-(2-(4-methylpiperazin-1-yl)ethyl) oxime (****5k****).*

Methanol as eluent, 78% yield, light yellow oil. IR (KBr) υ: 3055, 1655, 1590, 1485, 1444, 1070 (C-O) cm-1; 1H NMR (CDCl3, 400 MHz) δ 7.56 (d, *J* = 8.4 Hz, 1H) 7.46–7.32(m, 8H), 7.27 (d, *J* = 8.4 Hz, 1H), 4.34 (dt, *J* = 6.0, 2.4 Hz, 2H), 2.73 (dt, *J* = 6.0, 2.4 Hz, 2H), 2.52–2.42 (m, 8H), 2.29 (d, *J* = 7.6 Hz, 3H). MS m/z: 403 (M++1, 25), 402 (100).

*(p-Chlorophenyl)(phenyl)methanone O-(2-(4-ethylpiperazin-1-yl)ethyl) oxime (****5l****).*

Methanol as eluent, 71% yield, light yellow oil. IR (KBr) υ: 3057, 1680, 1596, 1489, 1445, 1060 cm-1; 1H NMR (CDCl3, 400 MHz) δ 7.54–7.25 (m, 9H), 4.36 (dt, *J* = 6.0, 2.4 Hz, 2H), 2.74 (dt, *J* = 6.0, 2.4Hz, 2H), 2.58–2.39 (m, 10H), 1.11 (dt, *J* = 7.2, 2.8 Hz,3H); MS m/z: 373 (M++1, 33), 372 (100).

*Phenyl(p-tolyl)methanone O-(2-(4-ethylpiperazin-1-yl)ethyl) oxime (****5m****).*

Methanol as eluent, 75% yield, light yellow oil. IR (KBr) υ: 3030, 1652, 1560, 1509, 1445, 1060 cm-1; 1H NMR (CDCl3, 400 MHz) δ7.49 (d, J=8.0 Hz, 1H), 7.42–7.32 (m, 5H), 7.28 (d, *J* =8.0 Hz, 1H), 7.14 (d, *J* =8.0 Hz, 1H), 4.34 (dd, *J* = 11.6, 6.0 Hz, 2H), 2.74 (dd, *J* = 11.6, 6.0 Hz, 2H), 2.70–2.35 (m,13H), 1.09 (dt, *J* = 7.2, 2.0 Hz, 3H); MS m/z: 353 (M++1, 25), 352 (100).

*(p-chlorophenyl)(phenyl)methanone O-(2-(4-benzylpiperazin-1-yl)ethyl) oxime (****5n****).*

Methanol as eluent, 80% yield, light yellow oil. IR (KBr) υ: 3060, 1670, 1596, 1492, 1444, 1057 (C-O) cm-1; 1H NMR (CDCl3, 400 MHz) δ 7.50–7.27 (m, 14H), 4.36 (dt, *J* = 6.0, 2.0 Hz, 2H), 3.54 (m, 2H), 2.75 (t, *J* = 6.0 Hz, 2H), 2.52–2.50 (m, 8H); MS m/z: 435 (M++1, 31), 434 (100).

*Phenyl(p-tolyl)methanone O-(2-(4-methylpiperazin-1-yl)ethyl) oxime (****5o****).*

Methanol as eluent, 72% yield, light yellow oil. IR (KBr) υ: 3048, 1667, 1593, 1516, 1444, 1055 cm-1; 1H NMR (CDCl3, 400 MHz) δ 7.53–7.13 (m, 9H), 4.34 (dd, *J* = 11.6, 6.0 Hz, 2H), 2.75 (dd, *J* = 11.6, 6.0 Hz, 2H), 2.53–2.42 (m,11H), 2.30 (d, *J* = 3.2 Hz, 3H); MS m/z: 339 (M++1, 26), 338 (100).

*(p-Chlorophenyl)(phenyl)methanone O-(2-morpholinoethyl) oxime (****5p****).*

Ethyl acetate as eluent, 89% yield, light yellow oil. IR (KBr) υ: 3054, 1667, 1593, 1486, 1444, 1040 cm-1; 1H NMR (CDCl3, 400 MHz) δ 7.50–7.30 (m, 9H), 4.36 (dt, *J* = 6.0, 2.8 Hz, 2H), 3.71 (dd, *J* = 9.6, 5.6 Hz, 4H), 2.73 (dt, *J* = 6.0, 2.8 Hz, 2H), 2.49 (dd, *J* = 9.6, 5.6 Hz, 4H); MS m/z: 346 (M++1, 22), 345 (100).

*(p-Bromophenyl)(phenyl)methanone O-(2-morpholinoethyl) oxime (****5q****).*

Ethyl acetate as eluent, 73% yield, light yellow oil. IR (KBr) υ: 3054, 1655, 1593, 1486, 1447, 1034 cm-1; 1H NMR (CDCl3, 400 MHz) δ 7.60–7.26 (m, 9H), 4.35 (dt, *J* = 6.0, 2.0 Hz, 2H), 3.73–3.68 (m,4H), 2.73 (dt, *J* = 6.0, 2.0 Hz, 2H), 2.49 (dd, *J* =9.6, 5.2 Hz, 4H); MS m/z: 390 (M++1, 22), 389 (100).

*Phenyl(p-tolyl)methanone O-(2-morpholinoethyl) oxime(****5r****).*

Ethyl acetate as eluent, 78% yield, light yellow oil. IR (KBr) υ: 3054, 1640, 1539, 1506, 1444, 1037 cm-1; 1H NMR (CDCl3, 400 MHz) δ 7.56–7.17 (m, 9H),4.42–4.35 (m, 2H), 3.76–3.71 (m, 4H), 2.79–2.75 (m, 2H), 2.53–2.38 (m, 7H); MS m/z: 326 (M++1, 25), 325 (100).

*1-(2-((((p-Chlorophenyl)(phenyl)methylene)amino)oxy)ethyl)piperidine-4-carboxylic acid (****5s****).*

Ethanol as eluent, 43% yield, white solid. IR (KBr) υ: 3056, 1672, 1573, 1486, 1444, 1019 cm-1; 1H NMR (*d*6-DMSO, 400 MHz) δ 7.54–7.30 (m, 9H), 4.24 (t, *J* = 5.6 Hz, 2H), 2.82–2.65 (m, 2H),2.17–1.97 (m, 3H), 1.77–1.74 (m, 2H), 1.58–1.49 (m, 2H); MS m/z: 388 (M++1, 37), 387 (100).

*1-(2-((((p-Bromophenyl)(phenyl)methylene)amino)oxy)ethyl)piperidine-4-carboxylic acid (****5t****).*

Ethanol as eluent, 47% yield, white solid. IR (KBr) υ: 3062, 1672, 1573, 1485, 1445, 1025 cm-1; 1H NMR (*d*6-DMSO, 400 MHz) δ7.67 (d, J = 8.4Hz, 2H), 7.43–7.38 (m, 5H), 7.28 (d, J = 8.4 Hz, 2H), 4.21 (t, *J* = 6.0 Hz, 2H), 2.78–2.75 (m, 2H), 2.59 (t, *J* = 6.0 Hz, 2H), 2.18–2.09 (m, 1H), 2.03–1.98 (m, 2H), 1.76–1.73 (m, 2H), 1.56–1.46 (m, 2H); MS m/z: 432 (M++1, 25),431 (100).

*1-(2-((((p-Chlorophenyl)(phenyl)methylene)amino)oxy)ethyl)piperidine-3-carboxylic acid (****5u****).*

Ethanol as eluent, 42% yield, white solid. IR (KBr) υ: 3053, 1646, 1594, 1489, 1447, 1019 cm-1; 1H NMR (*d*6-DMSO, 400 MHz) δ 7.53 (d, *J* = 8.4 Hz, 2H), 7.48–7.39 (m, 5H), 7.35 (d, *J* = 8.4 Hz, 2H). 4.22 (t, *J* = 6.0 Hz, 2H), 2.89-2.86 (m, 1H), 2.64–2.61 (m,3H), 2.41–2.35 (m, 1H), 2.20–2.15 (m, 1H),2.09–1.99 (m, 1H),1.79–1.74 (m, 1H), 1.45–1.42 (m, 1H), 1.38–1.29 (m, 1H); MS m/z: 388 (M++1, 35), 387 (100).

*1-(2-((((p-Bromophenyl)(phenyl)methylene)amino)oxy)ethyl)piperidine-3-carboxylic acid (****5v****).*

Ethanol as eluent, 39% yield, white solid. IR (KBr) υ: 3053, 1645, 1587, 1485, 1444, 1028 cm-1; 1H NMR (*d*6-DMSO, 400 MHz) δ7.67 (d, *J* = 8.4 Hz, 1H), 7.6 (d, *J* = 8.4 Hz, 1H), 7.46–7.28 (m, 7H), 4.25 (t, *J* = 6.0 Hz, 2H), 3.10–3.08 (m, 1H), 3.00–2.95 (m, 2H), 2.82–2.79 (m, 1H), 2.39–2.36 (m, 1H),1.72–1.63 (m, 2H),1.49–1.43(m, 3H), 1.34–1.29 (m, 1H); MS m/z: 432 (M++1, 29), 431 (100).

*1-(2-((((p-Chlorophenyl)(phenyl)methylene)amino)oxy)ethyl)piperidine-2-carboxylic acid (****5w****).*

Ethanol as eluent, 35% yield, white solid. IR (KBr) υ: 3051, 1645, 1587, 1489, 1444, 1017 cm-1; 1H NMR (*d*6-DMSO, 400 MHz) δ 7.55–7.30 (m, 9H), 4.26 (t, *J* = 6.0 Hz, 2H), 3.17–3.15 (m, 1H), 3.0–2.96(m,2H), 2.86–2.83 (m, 1H), 2.43–2.40 (m, 1H), 1.78–1.75 (m, 1H), 1.69–1.27 (m, 1H), 1.48–1.45 (m, 3H), 1.37–1.45 (m, 1H); MS m/z: 388 (M++1, 25), 387 (100).

*1-(2-((((p-Bromophenyl)(phenyl)methylene)amino)oxy)ethyl)piperidine-2-carboxylic acid (****5x****).*

Ethanol as eluent, 38% yield, white solid. IR (KBr) υ: 3051, 1667, 1587, 1484, 1453, 1028 cm-1; 1H NMR (*d*6-DMSO, 400 MHz) δ 7.68 (d, *J* = 8.4 Hz, 1H), 7.1 (d, *J* = 8.4 Hz, 1H), 7.48–7.39 (m, 4H), 7.34–7.28(m, 3H),4.30 (t, *J* = 5.6 Hz, 2H), 3.22–3.18 (m, 1H), 3.07–3.04 (m, 2H),2.94–2.90 (m, 1H), 2.48–2.46 (m, 1H), 1.83–1.78 (m, 1H), 1.70–1.62 (m, 1H), 1.53–1.45 (m, 3H), 1.37–1.33 (m, 1H); MS m/z: 432 (M++1, 28), 431 (100).

**Table S1 The average inhibitory rate at different concentration**

| Compound | Concentration (mg/L) | Inhibitory rate (%) | | | |
| --- | --- | --- | --- | --- | --- |
| *Oryza sativa* | *Sorghum sundanenses* | *Brassica Chinenses* | *Amaranthus mangostanus L.* |
| **5a** | 1 | 29.41 | 11.65 | 6.66 | 12.34 |
| 2.5 | 40.97 | 14.06 | 13.31 | 28.21 |
| 5 | 44.50 | 16.67 | 19.97 | 42.82 |
| 10 | 58.46 | 31.45 | 40.23 | 71.54 |
| 20 | 86.55 | 70.70 | 71.25 | 100.00 |
| 40 | 100.00 | 100.00 | 100.00 | - |
| **5b** | 1 | 12.45 | -10.97 | 10.91 | 5.29 |
| 2.5 | 20.31 | -16.94 | 15.58 | 16.12 |
| 5 | 25.49 | 16.38 | 24.08 | 23.32 |
| 10 | 47.10 | 22.92 | 33.85 | 42.97 |
| 20 | 86.18 | 65.53 | 47.52 | 81.36 |
| 40 | 100.00 | 100.00 | 82.44 | 100.00 |
| **5c** | 1 | -14.98 | -13.66 | 1.50 | 4.57 |
| 2.5 | -14.51 | 12.13 | 6.74 | 15.69 |
| 5 | -4.65 | 22.40 | 17.45 | 25.25 |
| 10 | -3.38 | 48.51 | 22.27 | 50.82 |
| 20 | 31.70 | 100.00 | 52.96 | 100.00 |
| 40 | 86.26 | 100.00 | 100.00 | - |
| **5d** | 1 | - | - | 4.64 | 7.22 |
| 2.5 | -19.45 | 25.21 | **-** | 20.37 |
| 5 | -19.80 | 35.81 | 11.39 | 25.64 |
| 10 | -7.37 | 40.22 | 17.03 | 41.45 |
| 20 | 10.15 | 65.25 | 28.96 | 58.18 |
| 40 | 82.03 | 100.00 | 54.30 | 77.01 |
| **5e** | 1 | 41.22 | 4.40 | 28.12 | 49.60 |
| 2.5 | 45.95 | 4.58 | - | 53.78 |
| 5 | 56.63 | 10.11 | 37.11 | 63.54 |
| 10 | 72.53 | 14.45 | 43.00 | 71.18 |
| 20 | 100.00 | 31.00 | 67.81 | 93.06 |
| 40 | 100.00 | 60.10 | 100 | 100 |
| 60 | 100.00 | 88.29 | - | 100 |
| **5f** | 1 | 28.36 | 30.32 | 26.83 | - |
| 2.5 | 33.29 | 31.82 | 29.66 | 18.91 |
| 5 | 49.43 | 35.79 | 33.23 | 24.57 |
| 10 | 71.34 | 48.12 | 35.20 | 28.80 |
| 20 | 100.00 | 66.01 | 78.39 | 68.95 |
| 40 | 100.00 | 81.66 | 100.00 | 100.00 |
| 60 | 100.00 | 100.00 | - | - |
| **5g** | 1 | 30.04 | 33.11 | 46.93 | 31.97 |
| 5 | 37.27 | 37.61 | 53.01 | 44.23 |
| 10 | 45.31 | 41.75 | 59.67 | 63.42 |
| 20 | 65.86 | 48.80 | 74.87 | 100.00 |
| 40 | 100.00 | 82.09 | 100.00 | 100.00 |
| 60 | 100.00 | 91.11 | - | - |
| **5h** | 1 | 3.93 | 73.07 | 10.37 | 10.42 |
| 5 | 15.23 | 75.32 | 17.09 | 21.46 |
| 10 | 19.34 | 77.57 | 24.50 | 40.50 |
| 20 | 35.06 | 81.10 | 39.93 | 71.74 |
| 40 | 72.13 | 93.94 | - | 100.00 |
| 60 | 100.00 | 100.00 | - | - |
| **5i** | 1 | 11.93 | -7.69 | 19.26 | 10.08 |
| 2.5 | 14.79 | 22.67 | 22.8 | 34.76 |
| 5 | 19.61 | 31.39 | 31.59 | 43.83 |
| 10 | 27.73 | 58.37 | 38.81 | 80.35 |
| 20 | 78.57 | 100.00 | 70.25 | 100.00 |
| 40 | 100.00 | 100.00 | 100.00 | 100.00 |
| **5j** | 1 | 29.58 | 31.62 | 24.65 | 26.95 |
| 2.5 | **-** | **-** | **-** | 42.32 |
| 5 | 38.19 | 38.39 | 35.27 | 47.36 |
| 10 | 65.04 | 47.50 | 55.67 | 67.51 |
| 20 | 87.23 | 78.23 | 80.17 | 100.00 |
| 40 | 100.00 | 100.00 | 100.00 | - |
| **5k** | 1 | 7.00 | 32.84 | 23.09 | 30.48 |
| 2.5 | 11.93 | **-** | **-** | 34.76 |
| 5 | 25.88 | 49.62 | 37.39 | 48.61 |
| 10 | 48.56 | 57.83 | 69.97 | 81.36 |
| 20 | 100.00 | 88.40 | 100.00 | 100.00 |
| 40 | 100.00 | 100.00 | 100.00 | 100.00 |
| **5l** | 1 | 8.26 | 23.08 | 19.83 | 38.54 |
| 2.5 | - | - | 31.73 | 38.54 |
| 5 | 47.34 | 30.58 | 44.48 | 57.93 |
| 10 | 62.28 | 45.49 | 61.61 | 78.84 |
| 20 | 88.24 | 53.82 | 100.00 | 100.00 |
| 40 | 100.00 | 100.00 | 100.00 | 100.00 |
| **5m** | 1 | 7.34 | 23.05 | 0.15 | 22.72 |
| 2.5 | 8.93 | **-** | 16.67 | 28.18 |
| 5 | 21.78 | 31.39 | **-** | 35.76 |
| 10 | 50.02 | 41.76 | 23.88 | 58.24 |
| 20 | 82.18 | 47.84 | 40.21 | 100.00 |
| 40 | 100.00 | 100.00 | 74.46 | - |
| **5n** | 1 | 43.47 | 24.82 | 16.15 | 27.85 |
| 2.5 | 50.70 | 27.64 | 18.98 | 34.51 |
| 5 | 55.97 | 38.75 | 23.91 | 51.95 |
| 10 | 61.85 | 62.83 | 24.65 | 69.98 |
| 20 | 100.00 | 81.48 | 28.47 | 87.41 |
| 40 | 100.00 | 100.00 | 51.98 | 100.00 |
| **5o** | 1 | -26.09 | 27.56 | 18.01 | 13.09 |
| 2.5 | -10.64 | 35.41 | **-** | 20.96 |
| 5 | -7.52 | 51.88 | 35.15 | 34.43 |
| 10 | 38.69 | 82.22 | **-** | 63.90 |
| 20 | 84.14 | 100.00 | 78.13 | 100.00 |
| 40 | 100.00 | 100.00 | 100.00 | 100.00 |
| **5p** | 1 | **-** | 4.43 | 19.08 | 7.81 |
| 2.5 | 16.87 | 7.70 | 21.26 | 13.43 |
| 5 | 22.94 | 13.28 | 22.38 | 16.74 |
| 10 | 29.41 | 18.57 | 26.06 | 25.44 |
| 20 | 47.66 | 34.80 | **-** | 47.61 |
| 40 | 65.78 | 65.78 | 48.16 | 76.32 |
| **5q** | 1 | 43.22 | 10.87 | 22.07 | 2.52 |
| 2.5 | **-** | 12.35 | 22.73 | 11.13 |
| 5 | 43.80 | 14.82 | 25.35 | 12.34 |
| 10 | 46.12 | 19.75 | 25.92 | 35.26 |
| 20 | 51.20 | 41.12 | 28.90 | 39.98 |
| 40 | 60.92 | 70.78 | 41.22 | 70.28 |
| **5r** | 1 | -20.72 | 18.10 | 18.18 | 15.17 |
| 2.5 | -17.76 | 18.30 | 18.44 | **-** |
| 5 | -11.90 | 18.95 | 18.61 | 18.62 |
| 10 | -5.82 | 19.91 | 19.80 | **-** |
| 20 | 9.55 | 23.91 | 22.04 | 41.22 |
| 40 | 40.15 | 29.33 | 24.33 | 70.49 |
| **5s** | 1 | 17.82 | 43.00 | 16.29 | 5.79 |
| 2.5 | 19.91 | 44.30 | 18.22 | 10.33 |
| 5 | 22.69 | 47.80 | **-** | 12.09 |
| 10 | 24.87 | 50.38 | 27.34 | 23.72 |
| 20 | 32.09 | 71.23 | 45.75 | 43.65 |
| 40 | 44.67 | 88.37 | 56.52 | 83.63 |
| **5t** | 1 | 13.95 | 11.46 | 10.94 | 8.00 |
| 2.5 | 17.83 | 12.10 | 10.34 | 8.67 |
| 5 | 23.14 | 12.91 | 14.73 | 11.14 |
| 10 | 25.92 | 13.62 | 16.71 | 16.86 |
| 20 | 34.79 | 17.55 | 22.45 | 19.20 |
| 40 | 42.14 | 19.12 | 34.42 | 31.50 |
| **5u** | 1 | 6.30 | 11.34 | 9.77 | 16.88 |
| 2.5 | 10.50 | 12.03 | 12.59 | 17.63 |
| 5 | 11.34 | 14.50 | 13.67 | 17.86 |
| 10 | 24.09 | 15.03 | 18.24 | 18.59 |
| 20 | 30.32 | 20.78 | 29.32 | 23.14 |
| 40 | 55.74 | 27.12 | 38.10 | 30.98 |
| **5v** | 1 | 5.43 | 12.79 | 16.54 | 6.75 |
| 2.5 | 8.47 | 13.28 | 19.20 | 7.56 |
| 5 | 11.45 | 13.80 | **-** | 10.33 |
| 10 | 20.09 | **-** | 22.65 | 14.61 |
| 20 | 25.07 | 15.62 | 27.79 | 21.66 |
| 40 | 43.01 | 17.02 | 37.68 | 34.76 |
| **5w** | 1 | 4.07 | -11.50 | -4.53 | 1.23 |
| 2.5 | 6.30 | -6.55 | -1.56 | 1.76 |
| 5 | 9.02 | 1.35 | -0.57 | 2.27 |
| 10 | 14.99 | 3.13 | 7.22 | 5.79 |
| 20 | 24.38 | 11.97 | 10.85 | 8.31 |
| 40 | 41.85 | 22.84 | 24.65 | 17.38 |
| **5x** | 1 | 4.92 | 0.76 | -1.13 | 5.92 |
| 2.5 | 8.73 | 1.63 | 1.42 | **-** |
| 5 | 14.79 | 3.13 | 1.95 | 6.80 |
| 10 | 15.55 | 6.70 | 5.04 | 8.06 |
| 20 | 26.47 | 13.39 | 10.48 | 10.08 |
| 40 | 47.37 | 26.98 | 23.94 | 14.61 |
| tribenuron | 1 | 60.07 | 46.54 | 37.34 | 55.15 |
| 2.5 | 63.95 | 51.09 | 47.76 | 63.40 |
| 5 | 70.22 | 60.22 | 60.17 | 67.64 |
| 10 | 84.08 | 77.28 | 80.09 | 86.89 |

“-” means abnormal data or no data.

**Table S2** Correlation analysis between the inhibitory rate on root growth of *Oryza sativa*, *Sorghum sundanenses* and the concentration of the test compounds

| Compound | *Oryza sativa* | | | *Sorghum sundanenses* | |
| --- | --- | --- | --- | --- | --- |
| Linear equation | R2 | Linear equation | | R2 |
| tribenuron | Y=2.6691X+57.235 | 0.9992 | Y=3.4418X+42.864 | | 0.9994 |
| **5a** | Y=2.8362X+30.139 | 0.9814 | Y=2.4062X+9.2735 | | 0.9559 |
| **5b** | Y=3.8613X+8.5740 | 0.9961 | Y=3.792X-10.6633 | | 0.9496 |
| **5c** | Y=2.6454X-21.2034 | 0.9839 | Y=5.5536X-8.8867 | | 0.9681 |
| **5d** | Y=2.7491X-33.4996 | 0.9690 | Y=1.9556X+22.986 | | 0.9903 |
| **5e** | Y=3.5131X+37.8343 | 0.9944 | Y=1.4437X+1.8547 | | 0.9987 |
| **5f** | Y=4.8930X+22.9748 | 0.9891 | Y=1.1921X+32.659 | | 0.9572 |
| **5g** | Y=1.8064X+28.2407 | 0.9986 | Y=1.053X+31.8761 | | 0.9592 |
| **5h** | Y=1.6233X+4.1537 | 0.9951 | Y=0.4725X+72.79 | | 0.9838 |
| **5i** | Y=3.4792X+3.7359 | 0.9233 | Y=5.1448X+1.3333 | | 0.9310 |
| **5j** | Y=3.1444X+26.710 | 0.9484 | Y=2.4827X+26.5905 | | 0.9691 |
| **5k** | Y=4.9316X+0.7005 | 0.9986 | Y=2.8170X+31.8197 | | 0.9799 |
| **5l** | Y=2.708X+34.36 | 0.9799 | Y=1.9182X+21.438 | | 0.9768 |
| **5m** | Y=4.1198X+2.3278 | 0.9789 | Y=1.9005X+19.9206 | | 0.9517 |
| **5n** | Y=2.8255X+40.642 | 0.9734 | Y=3.1046X+23.1985 | | 0.9430 |
| **5o** | Y=5.8284X-29.1629 | 0.9704 | Y=6.1309X+20.9121 | | 0.9991 |
| **5p** | Y=1.2948X+16.463 | 0.9648 | Y=1.5487X+3.8310 | | 0.9979 |
| **5q** | Y=0.47X+41.9081 | 0.9925 | Y=1.5599X+7.3897 | | 0.9960 |
| **5r** | Y=1.5375X-21.198 | 0.9981 | Y=0.2967X+17.5351 | | 0.9920 |
| **5s** | Y=0.6679X+18.269 | 0.9931 | Y=1.2135X+41.6369 | | 0.9676 |
| **5t** | Y=0.6793X+17.409 | 0.9921 | Y=0.2019X+11.8184 | | 0.9008 |
| **5u** | Y=1.2277X+6.9860 | 0.9765 | Y=0.4034X+11.5225 | | 0.9761 |
| **5v** | Y=0.9241X+6.8296 | 0.9707 | Y=0.1050X+13.0641 | | 0.9512 |
| **5w** | Y=0.9592X+4.2189 | 0.9948 | Y=0.801X-6.9392 | | 0.9132 |
| **5x** | Y=1.0304X+6.1575 | 0.9809 | Y=0.6754X-0.0702 | | 0.9999 |

**Table S3** Correlation analysis between the inhibitory rate on root growth of *Brassica chinensis*, *Amaranthus mangostanus L.* and the concentration of the test compounds

| Compound | *Brassica chinensis* | | *Amaranthus mangostanus L.* | |
| --- | --- | --- | --- | --- |
|  | Linear equation | R2 | Linear equation | R2 |
| tribenuron | Y=4.6308X+34.9226 | 0.9992 | Y=3.3790X+52.6423 | 0.9726 |
| **5a** | Y=3.3976X+4.1226 | 0.9962 | Y=6.3380X+9.4142 | 0.9804 |
| **5b** | Y=1.7661X+12.6230 | 0.9875 | Y=3.8903X+3.8568 | 0.9953 |
| **5c** | Y=2.4962X+0.8283 | 0.9931 | Y=4.9470X+1.1741 | 0.9983 |
| **5d** | Y=1.2516X+4.2401 | 0.9985 | Y=2.4909X+11.395 | 0.9415 |
| **5e** | Y=1.8583X+26.9615 | 0.9909 | Y=2.2257X+49.0942 | 0.9830 |
| **5f** | Y=2.0074X+24.2878 | 0.9208 | Y=2.2560X+13.2783 | 0.9529 |
| **5g** | Y=1.3618X+46.1975 | 0.9978 | Y=3.6175X+27.3473 | 0.9986 |
| **5h** | Y=1.5466X+9.0532 | 0.9995 | Y=3.2695X+6.6045 | 0.9972 |
| **5i** | Y=2.6312X+16.2816 | 0.9832 | Y=7.2378X+8.7804 | 0.9414 |
| **5j** | Y=2.9666X+22.2403 | 0.9836 | Y=3.633X+28.8503 | 0.9757 |
| **5k** | Y=4.1371X+20.3788 | 0.9608 | Y=5.8085X+21.9383 | 0.9837 |
| **5l** | Y=4.0045X+20.3855 | 0.9835 | Y=3.1624X+40.3661 | 0.9374 |
| **5m** | Y=1.8212X+2.9051 | 0.9853 | Y=4.1079X+19.9206 | 0.9978 |
| **5n** | Y=0.8422X+16.3385 | 0.9412 | Y=3.0949X+30.5090 | 0.9015 |
| **5o** | Y=3.0823X+17.0501 | 0.9874 | Y=5.6628X+6.9045 | 0.9990 |
| **5p** | Y=0.7338X+18.8019 | 0.9986 | Y=1.7493X+8.3385 | 0.9896 |
| **5q** | Y=0.4681X+21.5743 | 0.9641 | Y=1.6391X+7.1404 | 0.9242 |
| **5r** | Y=0.1638X+18.0905 | 0.9730 | Y=1.4424X+12.5756 | 0.9979 |
| **5s** | Y=1.0698X+17.0979 | 0.9249 | Y=1.9931X+3.7918 | 0.9985 |
| **5t** | Y=0.5860X+10.9428 | 0.9955 | Y=0.5883X+8.1978 | 0.9682 |
| **5u** | Y=0.7332X+10.6896 | 0.9541 | Y=0.3635X+16.0915 | 0.9828 |
| **5v** | Y=0.5194X+17.1371 | 0.9902 | Y=0.7196X+6.5301 | 0.9945 |
| **5w** | Y=0.7167X+3.3672 | 0.9651 | Y=0.4122X+0.7300 | 0.9893 |
| **5x** | Y=0.6191X-1.1494 | 0.9939 | Y=0.2219X+5.7218 | 0.9994 |
